# Supplementary material for: Toward the use of CVD-grown MoS2 nanosheets as field-emission source
Source: publisher site journal article supplement (doi:10.3762/bjnano.9.160), 2018-06-07
Supplement: Additional file 1 [file 2190-4286-9-160-S1.pdf]

## **Supporting Information**

for

### **Toward the use of CVD-grown MoS<sub>2</sub> nanosheets as field-emission source**

Geetanjali Deokar\*<sup>1,4</sup>, Nitul S. Rajput<sup>1</sup>, Junjie Li<sup>2</sup>, Francis Leonard Deepak<sup>2</sup>, Wei Ou-Yang\*<sup>3</sup>,  
Nicolas Reckinger<sup>4</sup>, Carla Bittencourt<sup>5</sup>, Jean-Francois Colomer<sup>4</sup> and Mustapha Jouiad\*<sup>1</sup>

Address: <sup>1</sup>Department of Mechanical and Materials Engineering, Masdar Institute of Science and Technology, A part of Khalifa University of Science and Technology, 54224, Abu Dhabi, United Arab Emirates; <sup>2</sup>Department of Advanced Electron Microscopy, Imaging and Spectroscopy, International Iberian Nanotechnology Laboratory (INL), Avenida Mestre Jose Veiga, Braga 4715-330, Portugal; <sup>3</sup>Engineering Research Center for Nanophotonics & Advanced Instrument, Ministry of Education, School of Physics and Materials Science, East China Normal University, 3663 North Zhongshan Road, Shanghai 200062, China; <sup>4</sup>Research Group on Carbon Nanostructures (CARBONNAGe), University of Namur, 61 Rue de Bruxelles, 5000 Namur, Belgium and <sup>5</sup>Chimie des Interactions Plasma-Surface (ChIPS), CIRMAP, Research Institute for Materials Science and Engineering, University of Mons, Mons, Belgium

Email: Geetanjali Deokar\* - gdeokar@masdar.ac.ae;

Wei Ou-Yang\* - ouyangwei@phy.ecnu.edu.cn;

Mustapha Jouiad\* - mjouiad@masdar.ac.ae

\*Corresponding author

### **Additional experimental data**

**Table S1:** Peak fitting analysis results of the Mo 3d, S 3p, and O 1s core-level high-resolution XPS spectra from Figure 2b,c (BE = binding energy and FWHM = full width at half maximum).

| Phase            | Core level<br>Mo3d/ S1s | Peak<br>BE | FWHM | Core level<br>S2p/O1s | Peak BE | FWHM |
|------------------|-------------------------|------------|------|-----------------------|---------|------|
| MoS <sub>2</sub> | Mo3d <sub>5/2</sub>     | 228.9      | 0.81 | S2p <sub>3/2</sub>    | 161.8   | 0.73 |
|                  | Mo3d <sub>3/2</sub>     | 232        | 0.91 | S2p <sub>1/2</sub>    | 163     | 0.73 |
| MoS <sub>2</sub> | S2s                     | 226.2      | 2.02 |                       |         |      |
| MoO <sub>2</sub> | Mo3d <sub>5/2</sub>     | 232.7      | 0.68 | O1s                   | 530.3   | 1.36 |
|                  | Mo3d <sub>3/2</sub>     | 235.6      | 1.67 |                       |         |      |
| -C-O             |                         |            |      | O1s                   | 532.0   | 2.54 |

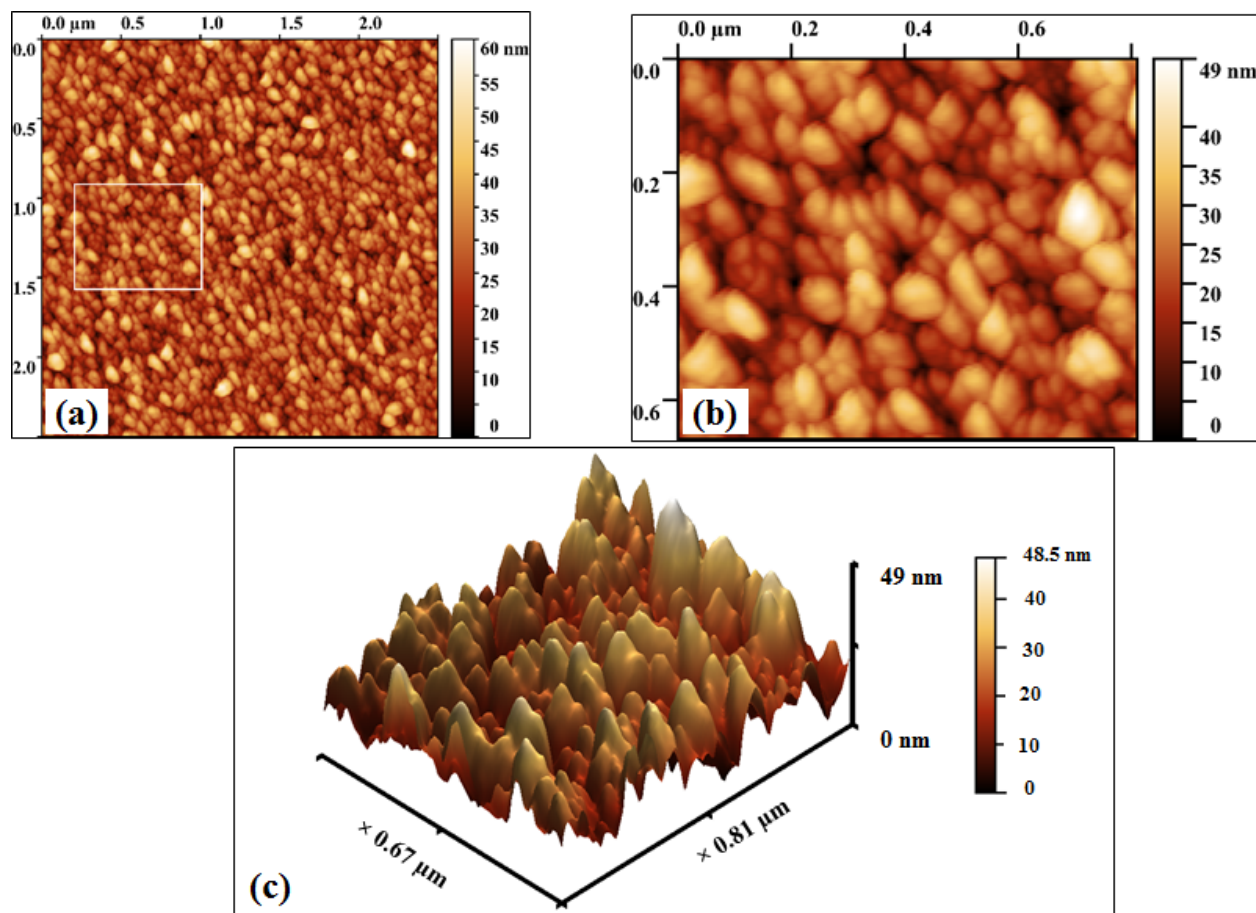

**Figure S1:** AFM resonant-mode mapping for MoS<sub>2</sub> sample grown by double sulfurization of a 50 nm Mo film at 850 °C on SiO<sub>2</sub>/Si substrates: (a) Topographic view of a 2.5 × 2.5 μm<sup>2</sup> area and (b) zoom-in over the white square in panel (a); (c) 3D image of panel (b).

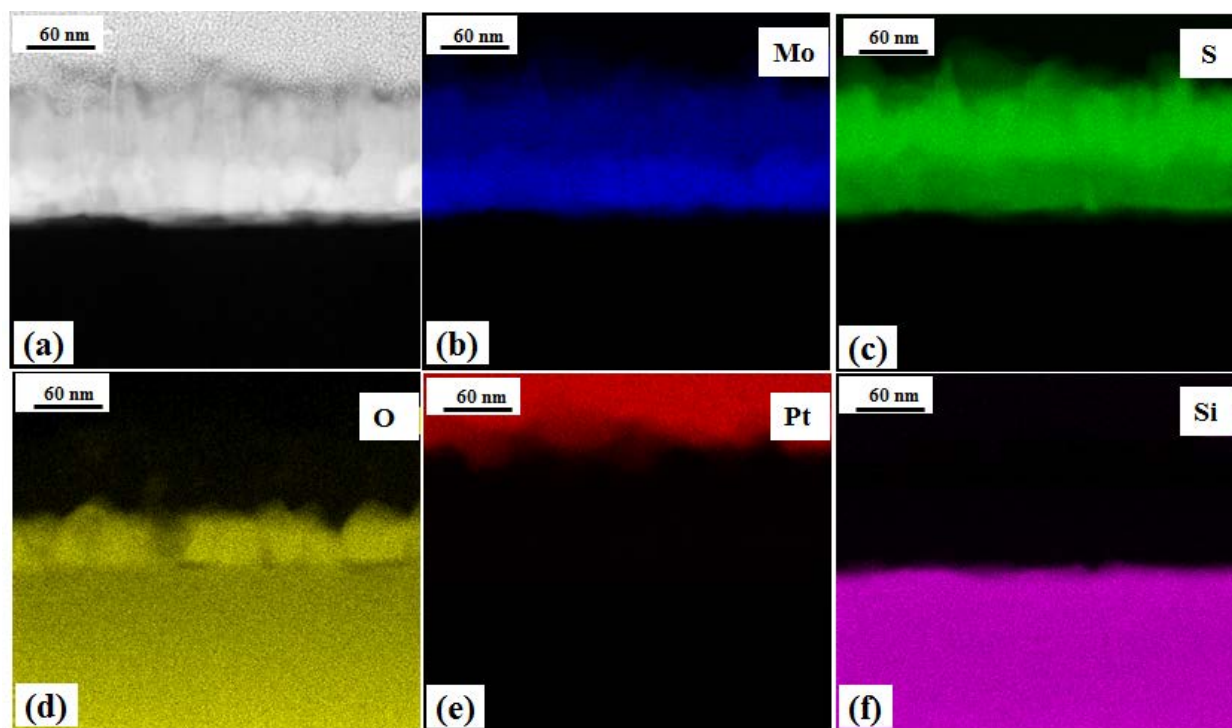

**Figure S2:** MoS<sub>2</sub> sample grown by double sulfurization of a 50 nm Mo film at 850 °C on SiO<sub>2</sub>/Si substrates: (a) HAADF-STEM image, (b–f) EDS mapping results for various elements, over the area in panel (a).
